# Supplementary material
Source: Springer Nature journal article supplement (https://www.springermedizin.de/resource/supplementary/12884_2013_806_MOESM1_ESM.pdf/9458242)
Supplement: MOESM1 [file 9458242]

568 women

279 (49%)  
Planned  
caesarean section

289 (51%)  
Planned vaginal  
birth

246 (88%)  
Elective  
caesarean section

33 (12%)  
Acute caesarean  
section

104 (36%)  
Acute caesarean  
section

185 (64%)  
Vaginal delivery
